# Supplementary material
Source: publisher figshare collection journal article supplement (https://acs.figshare.com/ndownloader/files/8009458)
Supplement: Supplementary file 1 [file 8009458]

# Supporting Information

## **Insight into the mechanism of water adsorption/desorption in hydrophilic viologen-carboxylate based PCP**

*Maxime Leroux, Nicolas Mercier, \* Jean-Pierre Bellat, Guy Weber*

*and Igor Bezverkhyy\**

## A- Synthesis

### A1- Procedure for the preparation of the pc2 ligand:

#### First step : synthesis of 1,1'-bis-(2,4-Dinitrophenyl)-4,4'-bipyridinium dichloride ((DNP)<sub>2</sub>Cl)

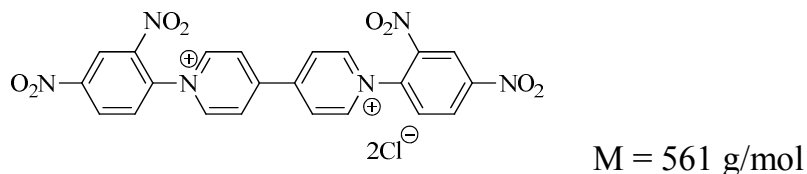

The mixture of 4,4'-bipyridine (6.20 g, 36mmol) and 2,4-dinitrochlorobenzene (17.0 g, 84 mmol) in 70 mL of ethanol (aq. EtOH, 96 %) is refluxed for 24 h. After cooling to the room temperature, precipitation is filtered and dried under vacuum. 13.3 g (60 %) of pale-green powder is obtained.

RMN <sup>1</sup>H (300 MHz, D<sub>2</sub>O, ppm): δ=9.52 (d, 4H, J = 9.0 Hz, ArH), 9.45 (d, 2H, J = 3.0 Hz, ArH), 9.00 (d, 2H, J = 3.0 Hz, ArH), 8.97 (d, 4H, J = 9.0 Hz, ArH), 8.34 (d, 2H, J = 9.0 Hz, ArH).

#### Second step: synthesis of 4,4'-bis(3-carboxyphenyl)-bipyridinium dichloride (H<sub>2</sub>PC2Cl<sub>2</sub>)

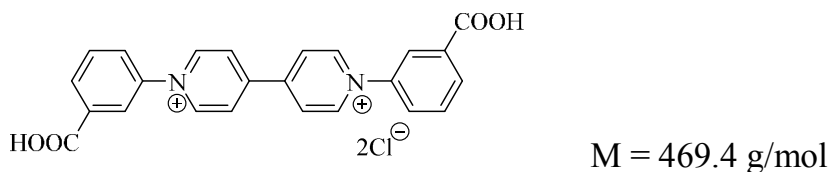

To 4 g (8.5 mmol) of 1,1'-bis-(2,4-Dinitrophenyl)-4,4'-bipyridinium dichloride ((DNP)<sub>2</sub>Cl) in 150 mL of ethanol (aq. EtOH, 96%), 2.34 g (17.1 mmol) of 3-aminobenzoic acid is added. The mixture is stirred together at 80°C during 24 h, then cooled to room temperature. The brown mixture obtained is filtered, washed with ethanol, diethyl ether and dried under vacuum. Finally, 3.1 g (72%) of the final product as a light brown powder, is obtained.

RMN <sup>1</sup>H (300 MHz, D<sub>2</sub>O, ppm): δ=9.77 (d, 4H, vio), 9.13 (d, 4H, vio), 8.50 (s, 1 arom H), 8.32 (d, 2 arom H), 8.22 (d, 2 arom H), 7.94 (t, 2 arom H).

## **A2- Synthesis of the material:**

In a 25mL Teflon-lined stainless-steel autoclave; 24.3mg (0.05mmol) of  $(\text{H}_2\text{pc2})\text{Cl}_2$ , 21mg (0.1mmol) of  $\text{H}_3\text{BTC}$  and 62.2mg (0.2mmol) of cadmium perchlorate  $\text{Cd}(\text{ClO}_4)_2$  were totally dissolved in a 1:1 mixture of DMF/ $\text{H}_2\text{O}$  (2mL/2mL). The autoclave is then placed in a programmable oven, slowly heat to  $105^\circ\text{C}$  in 7h, maintained at this temperature for 48h and slowly cooled to room temperature in 8h. The yellow scale-shaped crystals (see photo) were filtered off and washed with DMF, then air dried.

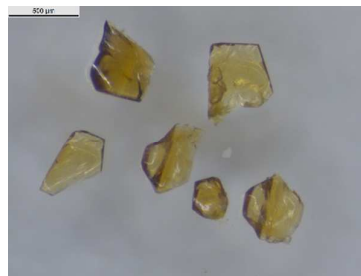

## B-X-Ray Powder Diffraction

### B-1-[1(H<sub>2</sub>O)<sub>2</sub>] 6H<sub>2</sub>O

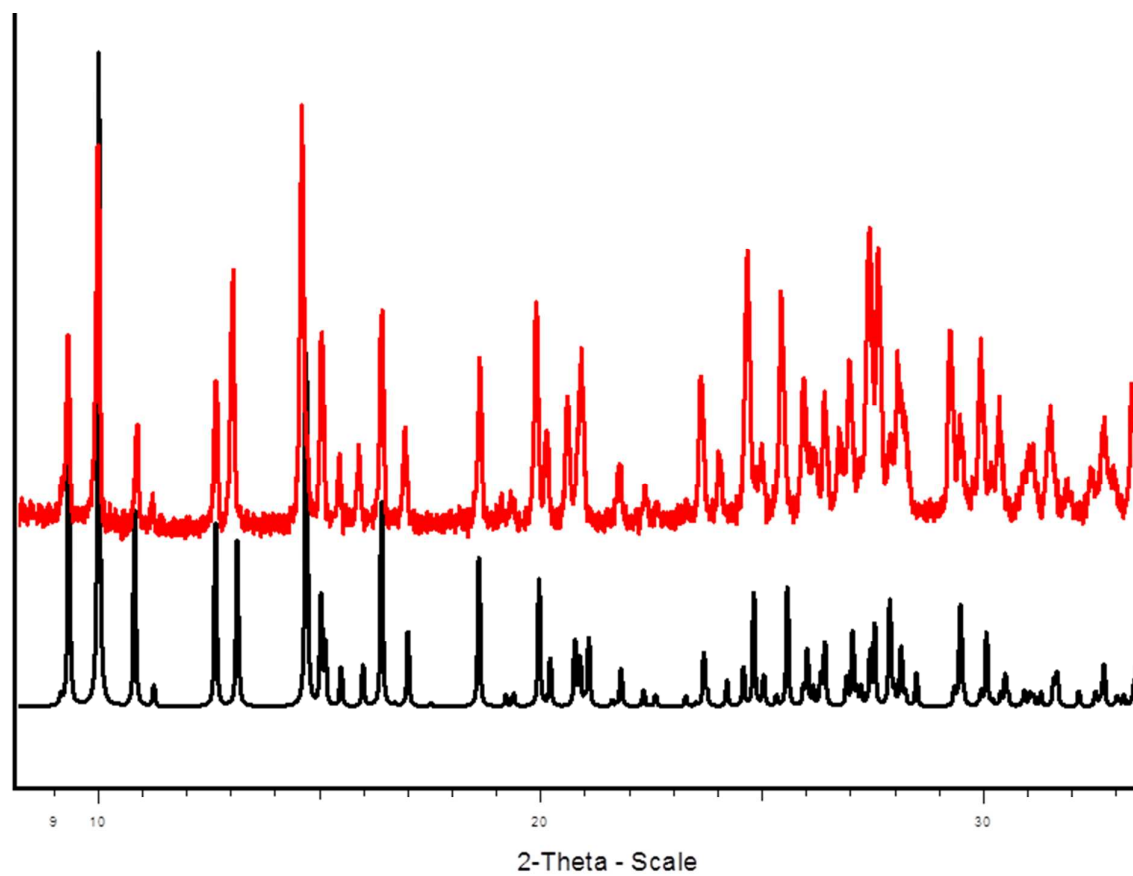

**Fig. S1.** Theoretical (black) and experimental (red) XRPD of [1(H<sub>2</sub>O)<sub>2</sub>] 6H<sub>2</sub>O

**B-2-Thermodiffractometry** ( $[1(\text{H}_2\text{O})_2] 6\text{H}_2\text{O}$  ; RT-145°C range)

- \* 1<sup>st</sup> transition at 35°C. Partially dehydrated phase stable in the 35°C-65°C range
- \* 2<sup>nd</sup> transition at 75°C. Dehydrated phase stable over 75°C
- \* 3<sup>rd</sup> transition at 115°C of the dehydrated phase

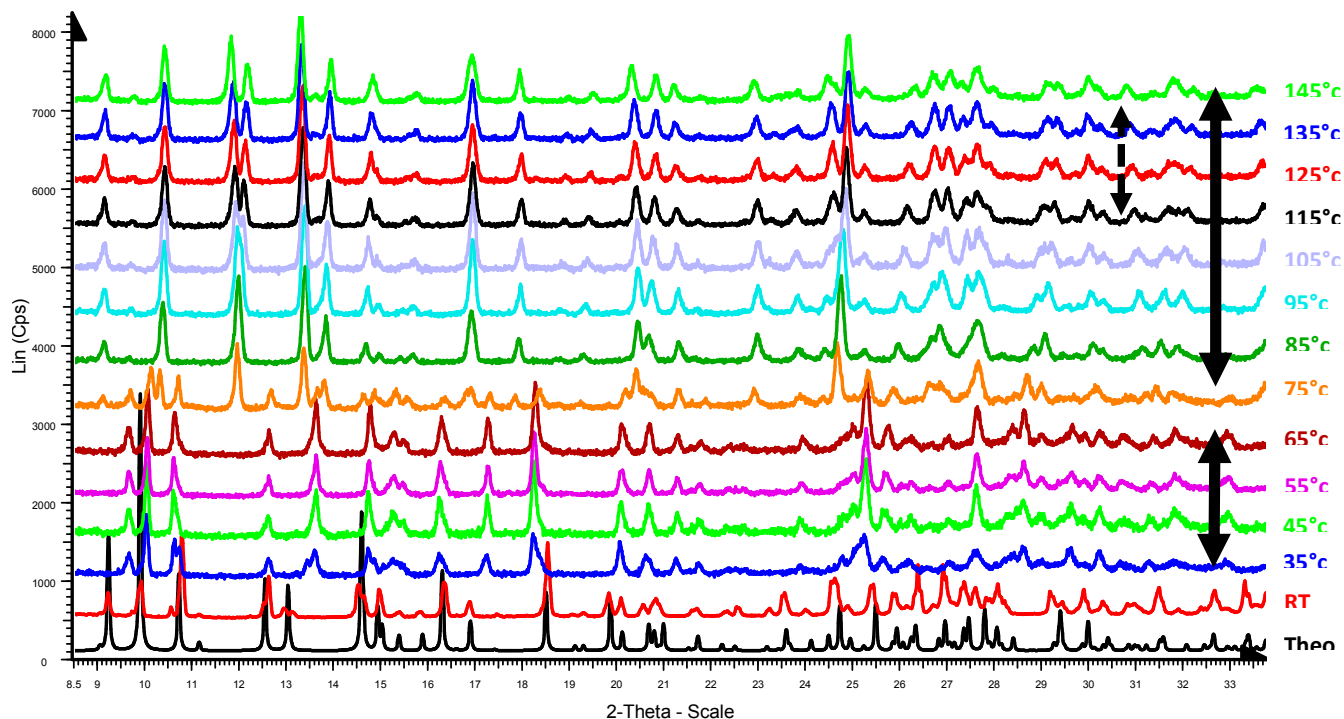

**Fig. S2.** Thermodiffractometry of  $[1(\text{H}_2\text{O})_2] 6\text{H}_2\text{O}$  in the RT-145°C range.

**B-3-Stability of  $[1(\text{H}_2\text{O})_2] 6\text{H}_2\text{O}$  in water**

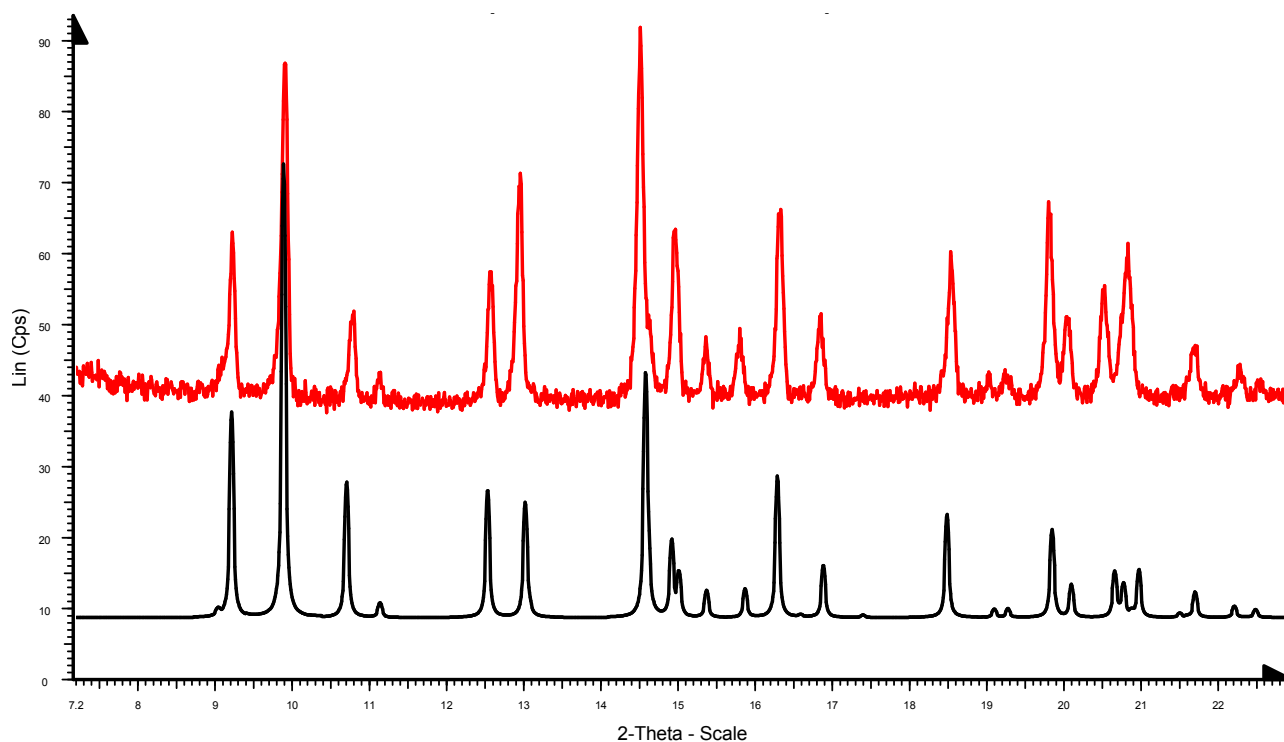

**Fig. S3.** Theoretical XRPD (black), and experimental XRPD of  $[1(\text{H}_2\text{O})_2] 6\text{H}_2\text{O}$  after 24h in water solution (red).

## C- Crystal structures

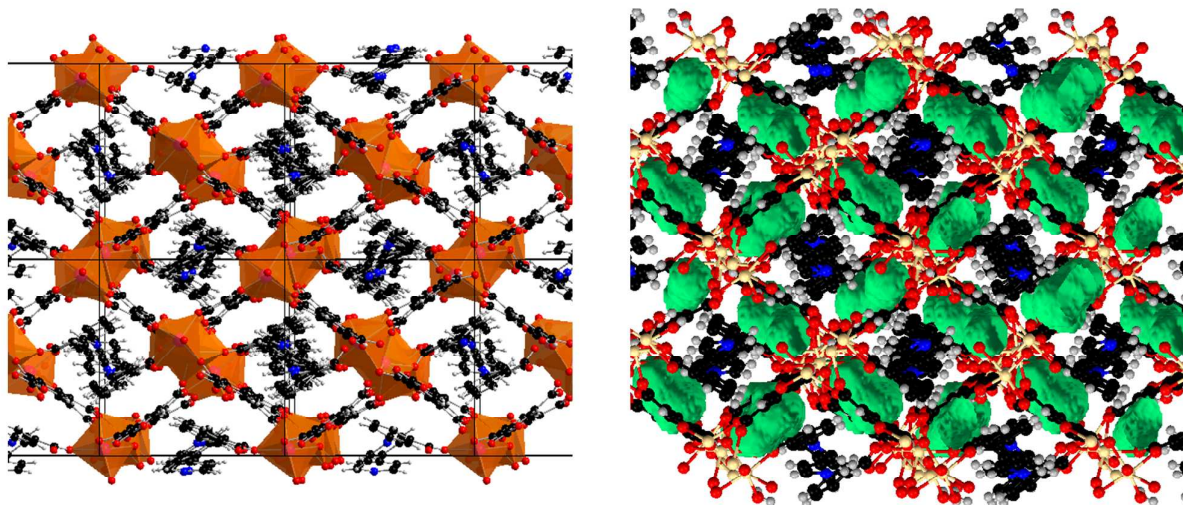

**Fig. S4.** General view of structure of  $[1(\text{H}_2\text{O})]3\text{H}_2\text{O}$  along the c axis (water molecules in pores omitted for clarity): polyhedra representation showing the connectivity between the trimeric units (a), and ball and stick representation showing the cavities present inside the structure representing 7 % of the volume (green volumes)

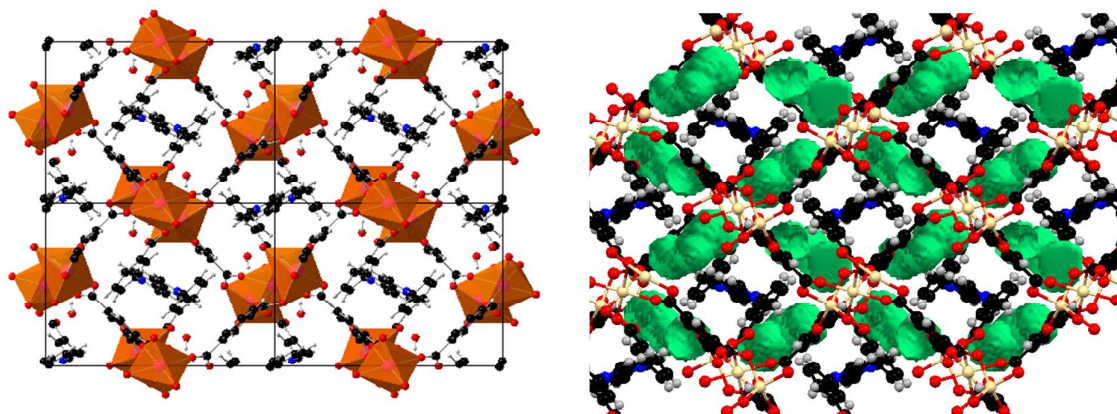

**Fig. S5.** General view of structure of  $[1]^2\text{H}_2\text{O}$  along the c axis (water molecules in pores omitted for clarity): polyhedra representation showing the connectivity between the trimeric units (a), and ball and stick representation showing the cavities present inside the structure representing 7 % of the volume (green volumes)

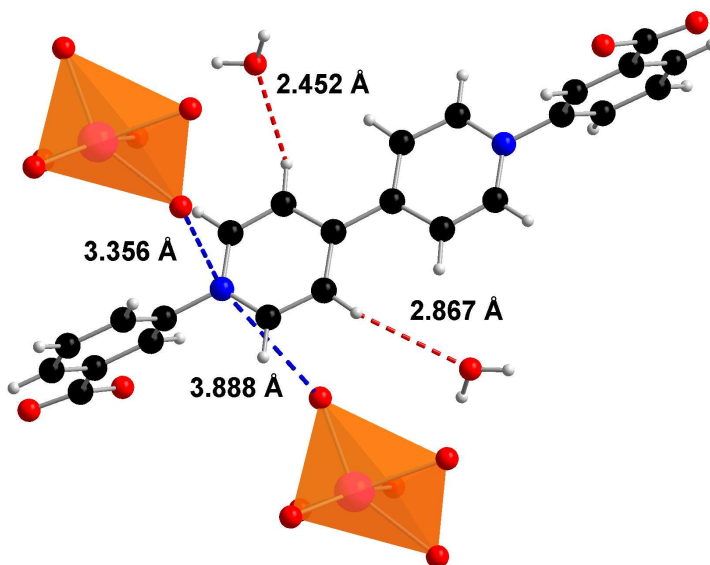

**Fig. S6.** Detail of the structure of  $[1] \cdot 2\text{H}_2\text{O}$  showing the interactions of the guest water molecules with the H atoms of the bipyridinium core.

#### D- Adsorption measurements

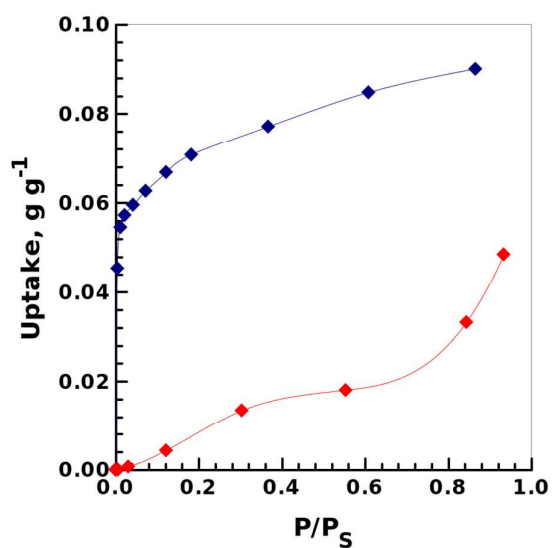

**Fig. S7.** Adsorption isotherms of methanol on  $[1]$  at 298 K (blue curve) and on  $[1]$  after one  $\text{NH}_3$  adsorption-desorption cycle (red curve).



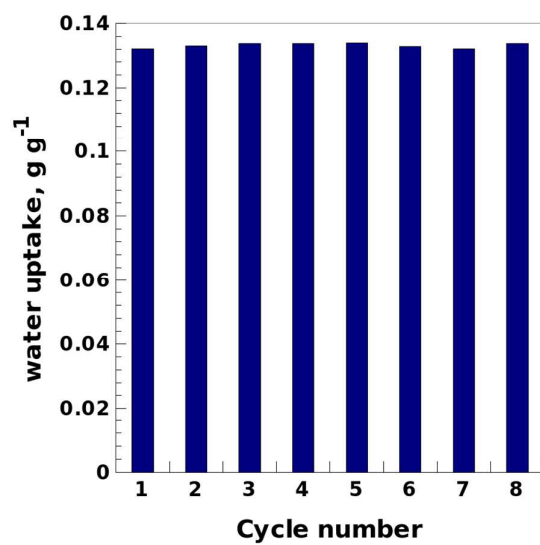

**Fig. S8.** Water uptake of the material at  $P/P_s = 0.8$  in successive adsorption-desorption cycles.
